# Supplementary material
Source: publisher figshare collection journal article supplement (https://acs.figshare.com/ndownloader/files/5722899)
Supplement: Supplementary file 1 [file 5722899]

## EXPERIMENTAL.

**NMR Experiments.** The NMR sample was prepared by mixing equimolar amounts of the two strands, each desalted on a Sephadex G15 column. The final concentration was ~3mM hybrid, 10mM sodium phosphate buffer, 100mM NaCl and 0.05 mM EDTA. We recorded standard NOESY, DQF-COSY-, TOCSY-, watergate NOESY-, and  $^1\text{H}$ - $^{13}\text{C}$  HSQC-spectra at either 500 or 800 MHz at 25 °C on either a Varian INOVA 800 Spectrometer or a Varian INOVA 500 Spectrometer employing the States phase cycling scheme.

NOESY spectra with mixing times of 250 ms and 80 ms were acquired in  $\text{D}_2\text{O}$  at 800 MHz using spectral widths of 8000 Hz, 2048 complex points in  $t_2$ , and 512  $t_1$ -experiments, each with 64 scans, with a repetition delay of 2.5 s. The residual signal from HDO was removed by presaturation. A watergate NOESY spectrum with a mixing time of 200 ms was acquired in  $\text{H}_2\text{O}/\text{D}_2\text{O}$  (9:1) at 500 MHz using a spectral width of 5000 Hz, 2048 complex points in  $t_2$ , and 600  $t_1$ -experiments, each with 96 scans, with a repetition delay of 3.5 s.

DQF-COSY and TOCSY spectra were acquired in  $\text{D}_2\text{O}$  at 800 MHz using spectral widths of 8000 Hz, 2048 complex points in  $t_2$ , and 1024 and 512  $t_1$ -experiments, respectively, each with 48/32 scans, with a repetition delay of 2.0 s. The residual signal from HDO was removed by presaturation. A DQF-COSY spectrum was obtained with a pulse sequence in which the first pulse was replaced with an E-BURP type selective pulse.<sup>1</sup> This spectrum was acquired in  $\text{D}_2\text{O}$  at 500 MHz with spectral widths of 5000 Hz and 1200 Hz in  $F_2$  and  $F_1$ , respectively. 2048 complex points were used in  $t_2$ , and 1024  $t_1$ -experiments, each with 80 scans, with a repetition delay of 2.4 s. An E-COSY spectrum was obtained with a pulse sequence in which the first pulse was replaced with an E-BURP type selective pulse.<sup>1</sup> This spectrum was acquired in  $\text{D}_2\text{O}$  at 500 MHz with spectral widths of 5000 Hz and 1200 Hz in  $F_2$  and  $F_1$ , respectively. 2048 complex points were used in  $t_2$ , and 450  $t_1$ -experiments, each with 96 scans, with a repetition delay of 2.4 s.

A  $^1\text{H}$ ,  $^{13}\text{C}$ -HSQC spectrum was acquired in  $\text{D}_2\text{O}$  at 800 MHz with spectral widths of 8000 Hz and 15000 Hz in  $F_2$  and  $F_1$ , respectively. 2048 complex points were used in  $t_2$ , and 1024  $t_1$ -experiments, each with 64 scans, with a repetition delay of 1.7 s.

A J-scaled  $^1\text{H}$ ,  $^{31}\text{P}$ -HMBC spectrum was acquired in  $\text{D}_2\text{O}$  at 500 MHz with spectral widths of 3000 Hz and 600 Hz in  $F_2$  and  $F_1$ , respectively.<sup>2</sup> 2048 complex points were used in  $t_2$ ,

and 56  $t_1$ -experiments, each with 976 scans, with a repetition delay of 2.7 s. The scaling factor employed was  $\hat{e} = 5$ .

The acquired data were processed with FELIX (version 97.2, MSI/Biosym Technologies, San Diego, CA). All spectra were apodized by skewed sinebell squared in  $F_1$  and  $F_2$ . NOESY spectra were baseline-corrected in  $F_2$  by means of the FLATT routine.<sup>3</sup> The J-scaled  $^1\text{H}$ ,  $^{31}\text{P}$ -HMBC spectrum was linear predicted from 28 to 56 points.

**MD-Simulation.** For the partly and fully modified hybrids, MD simulations were performed with standard A-form starting geometries. For reference, an MD simulation of the unmodified hybrid was also performed with standard A-form starting geometry. Partial atomic charges for the  $\alpha$ -L-LNA nucleotides were determined by the RESP procedure.<sup>4</sup> The modified nucleotides were built in the *xleap* module of AMBER,<sup>5</sup> and the hybrids were subjected to 1000 steps of *in vacuo* energy minimisation (EM). Afterwards the nucleic acids were neutralised by placing sodium ions at a distance of 3 Å from the phosphorous atoms on the OPO-bisectors. The nucleic acids were then submerged in rectangular periodic boxes of TIP3P water stretching 10 Å beyond the duplexes, this resulted in the addition of ca. 4100 water molecules per duplex. The sizes of the boxes were approx. 46 x 46 x 58 Å after equilibration. Equilibration was performed by 1000 steps of EM with positional restraints (500 kcal/mol) on the nucleic acids atoms, followed by 70 ps of MD with gradually lowered positional restraints on the nucleic acid atoms. Production runs were performed over 1 ns. All MD calculations were performed with the SANDER module of AMBER6.<sup>5</sup> at constant temperature/pressure (300K/1 atm) using 2 fs time steps. The SHAKE algorithm was applied to constrain all bonds to hydrogens. A non-bonded cut-off of 10 Å was applied and electrostatic interactions were calculated using the PME procedure with a grid spacing of ~1 Å. During the production runs, coordinates were dumped at every ps.

## References.

- 1) Geen, H.; Freeman, R. *J. Magn. Reson.* **1991**, 93, 93.
- 2) Gotfredsen, C. H.; Meissner, A.; Duus, J. Ø.; Sørensen, O. W. *Magn. Reson. Chem.* **2000**, 38, 692.
- 3) Güntert, P.; Wüthrich, K. *J. Magn. Reson.* **1992**, 96, 403.
- 4) Bayly, C. I.; Cieplak, P.; Cornell, W. D.; Kollman, P. A. *J. Phys. Chem.* **1993**, 97, 10269.

- 5) Pearlman, D. A.; Case, D. A.; Caldwell, J. W.; Ross, W. S.; Cheatham III, T. E.; DeBolt, S.; Ferguson, D. M.; Seibel, G. L.; Kollman, P. A. *Comp. Phys. Commun.* **1995**, *91*, 1.

## Figure Legends

**Figure S1.** *a)* The aromatic - H1' region of the 250 ms NOESY spectrum of  $d(C_1^{\text{A}^L}T_2^L G_3A_4^{\text{A}^L}T_5^L A_6^{\text{A}^L}T_7^L G_8C_9):r(G_{10}C_{11}A_{12}U_{13}A_{14}U_{15}C_{16}A_{17}G_{18})$  obtained at 800 MHz. The sequential H1'(n) - H6/H8(n+1) connectivity pathway is shown (full line for the  $\alpha$ -L-LNA strand and broken line for the RNA strand). The adenine H2 resonances are indicated with bold lines. *b)* Identical region as in *a)* of a 250 ms NOESY spectrum calculated from the last 500 ps of the MD simulation of  $d(C^{\text{A}^L}T^LGA^{\text{A}^L}T^LA^{\text{A}^L}T^LGC):r(GCAUAUCAG)$ .

**Figure S2.** *a)* The H1' - H2'/H2'' region of an experimental selective DQF-COSY of the  $d(C_1^{\text{A}^L}T_2^L G_3A_4^{\text{A}^L}T_5^L A_6^{\text{A}^L}T_7^L G_8C_9):r(G_{10}C_{11}A_{12}U_{13}A_{14}U_{15}C_{16}A_{17}G_{18})$  duplex obtained at 500 MHz. The resonances of the six deoxyribose are indicated. *b)* The DQF-COSY spectrum calculated with the parameters obtained by spectral simulation with the CHEOPS program.

**Figure S3.** *a)* The H1' - H2'/H2'' region of an experimental selective E-COSY of the  $d(C_1^{\text{A}^L}T_2^L G_3A_4^{\text{A}^L}T_5^L A_6^{\text{A}^L}T_7^L G_8C_9):r(G_{10}C_{11}A_{12}U_{13}A_{14}U_{15}C_{16}A_{17}G_{18})$  duplex obtained at 500 MHz. The resonances of the six deoxyribose are indicated. *b)* The E-COSY spectrum calculated with the parameters obtained by spectral simulation with the CHEOPS program.

**Figure S4.** *a)* The deoxyribose sugar pucker distributions from the last 500 ps of the MD simulation of the unmodified duplex. *b)* The ribose sugar pucker distributions from the last 500 ps of the MD simulation of the unmodified duplex.

**Figure S5.** *a)* The deoxyribose sugar pucker distributions from the last 500 ps of the MD simulation of the partly modified duplex. *b)* The ribose sugar pucker distributions from the last 500 ps of the MD simulation of the partly modified duplex.

**Figure S6.** *a)* The deoxyribose sugar pucker distributions from the last 500 ps of the MD simulation of the fully modified duplex. *b)* The ribose sugar pucker distributions from the last 500 ps of the MD simulation of the fully modified duplex.

**Figure S7.** CD spectra of the unmodified hybrid (-----), the partly modified  $\alpha$ -L-LNA:RNA hybrid,  $d(C_1^{\text{A}^L}T_2^L G_3A_4^{\text{A}^L}T_5^L A_6^{\text{A}^L}T_7^L G_8C_9):r(G_{10}C_{11}A_{12}U_{13}A_{14}U_{15}C_{16}A_{17}G_{18})$  (——) and for comparison the partly modified LNA:RNA hybrid,  $d(C_1T_2G_3A_4T_5A_6T_7G_8C_9):r(G_{10}C_{11}A_{12}U_{13}A_{14}U_{15}C_{16}A_{17}G_{18})$  (.....).

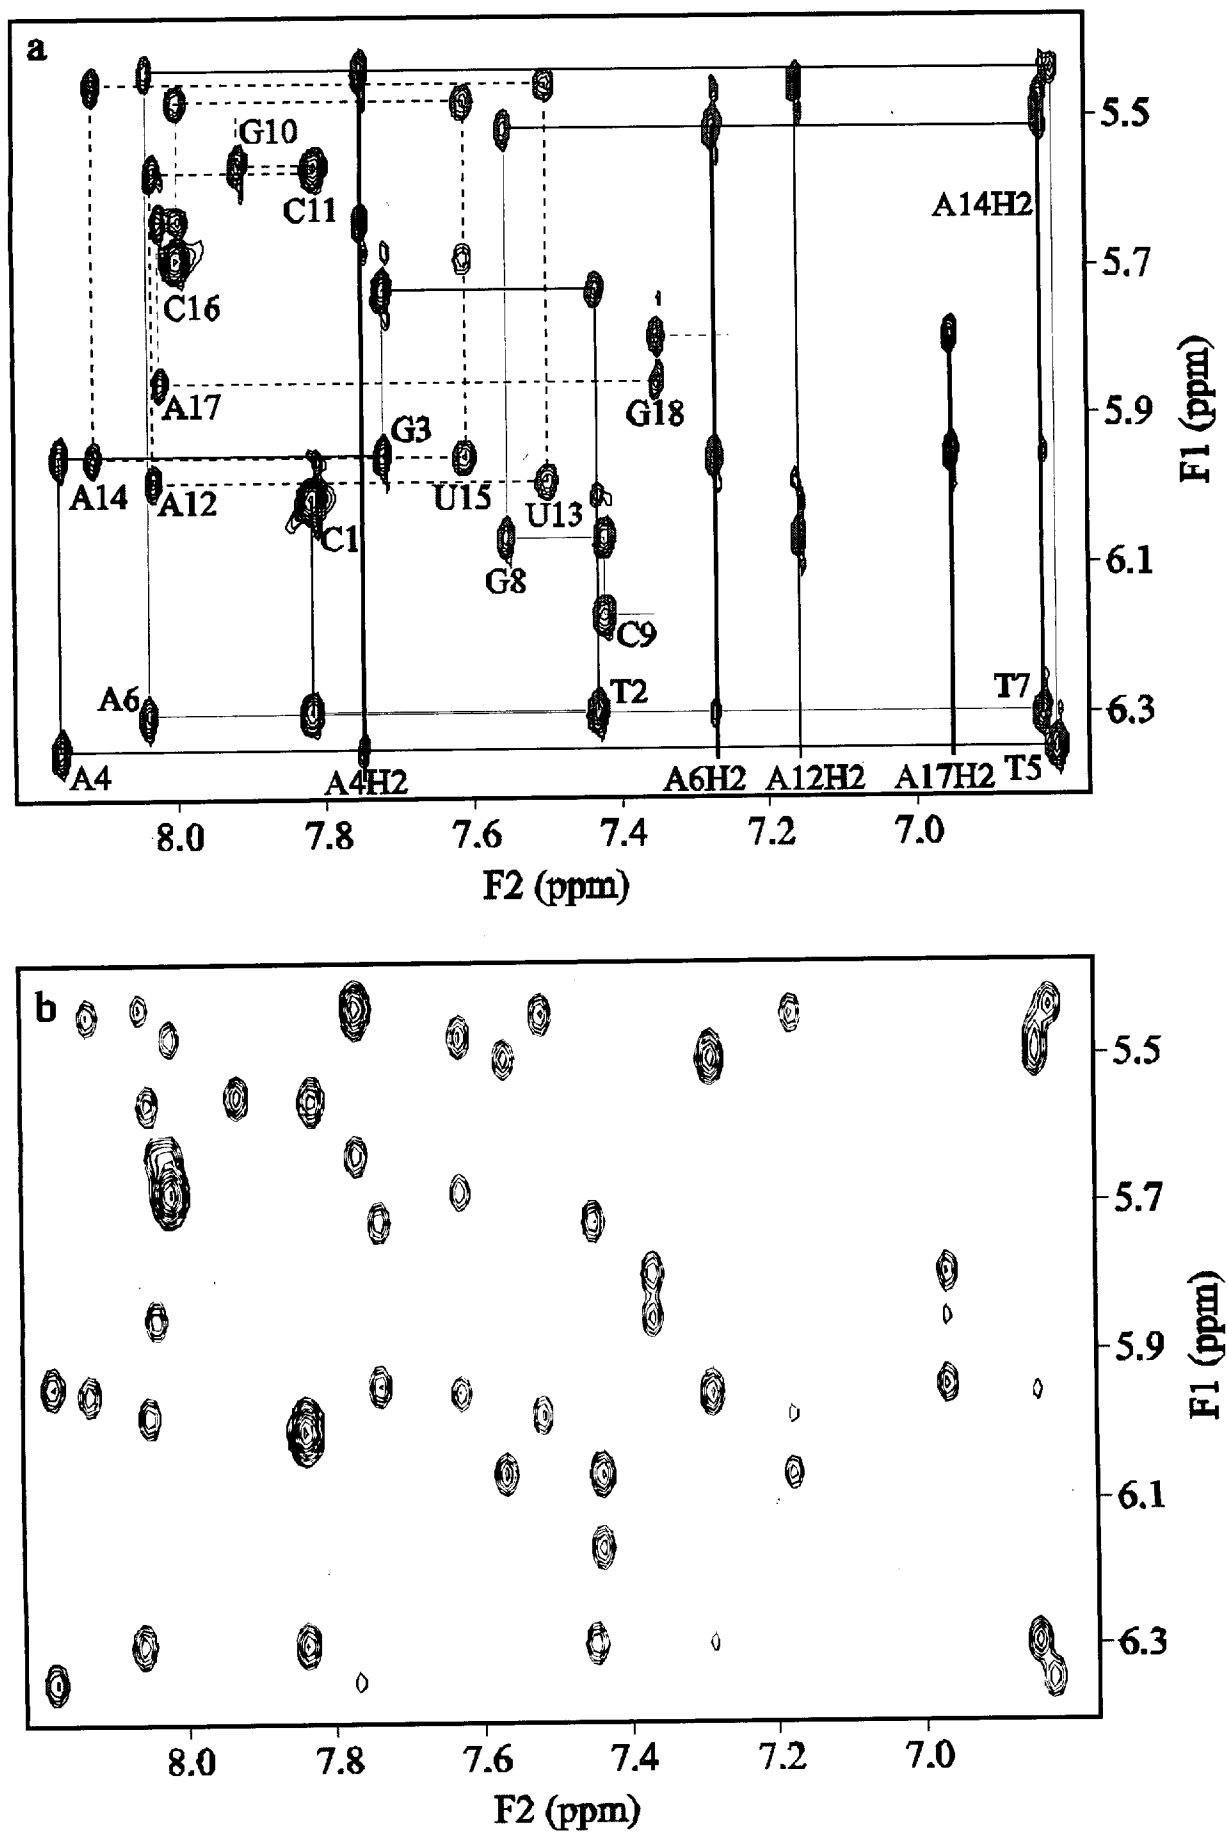

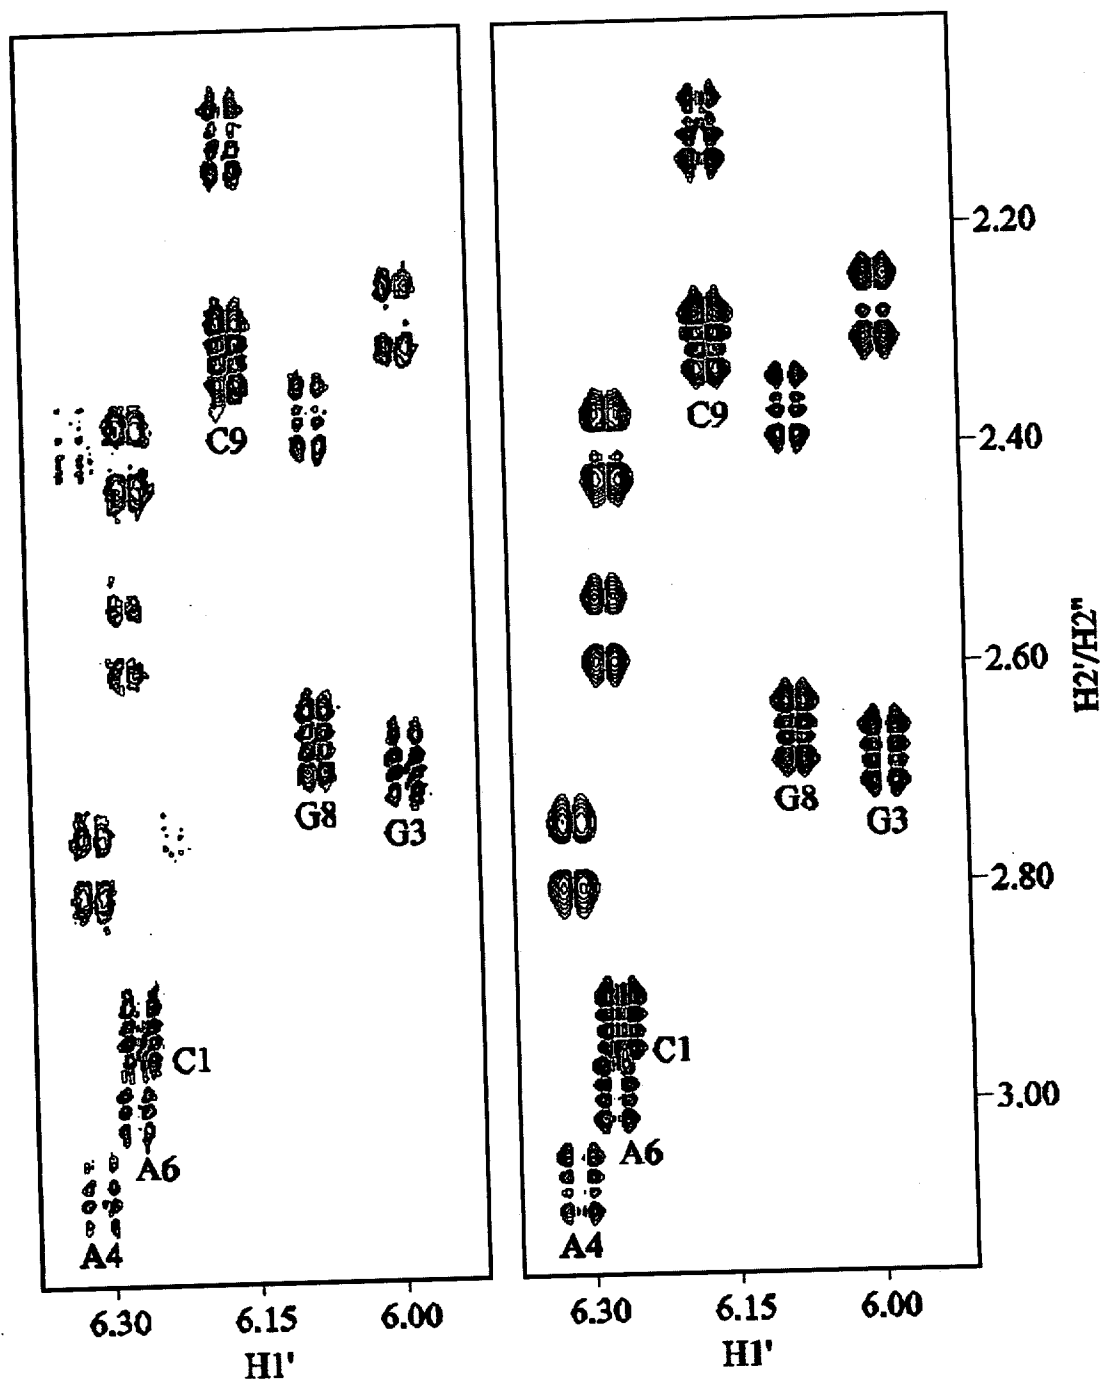

Figure S2

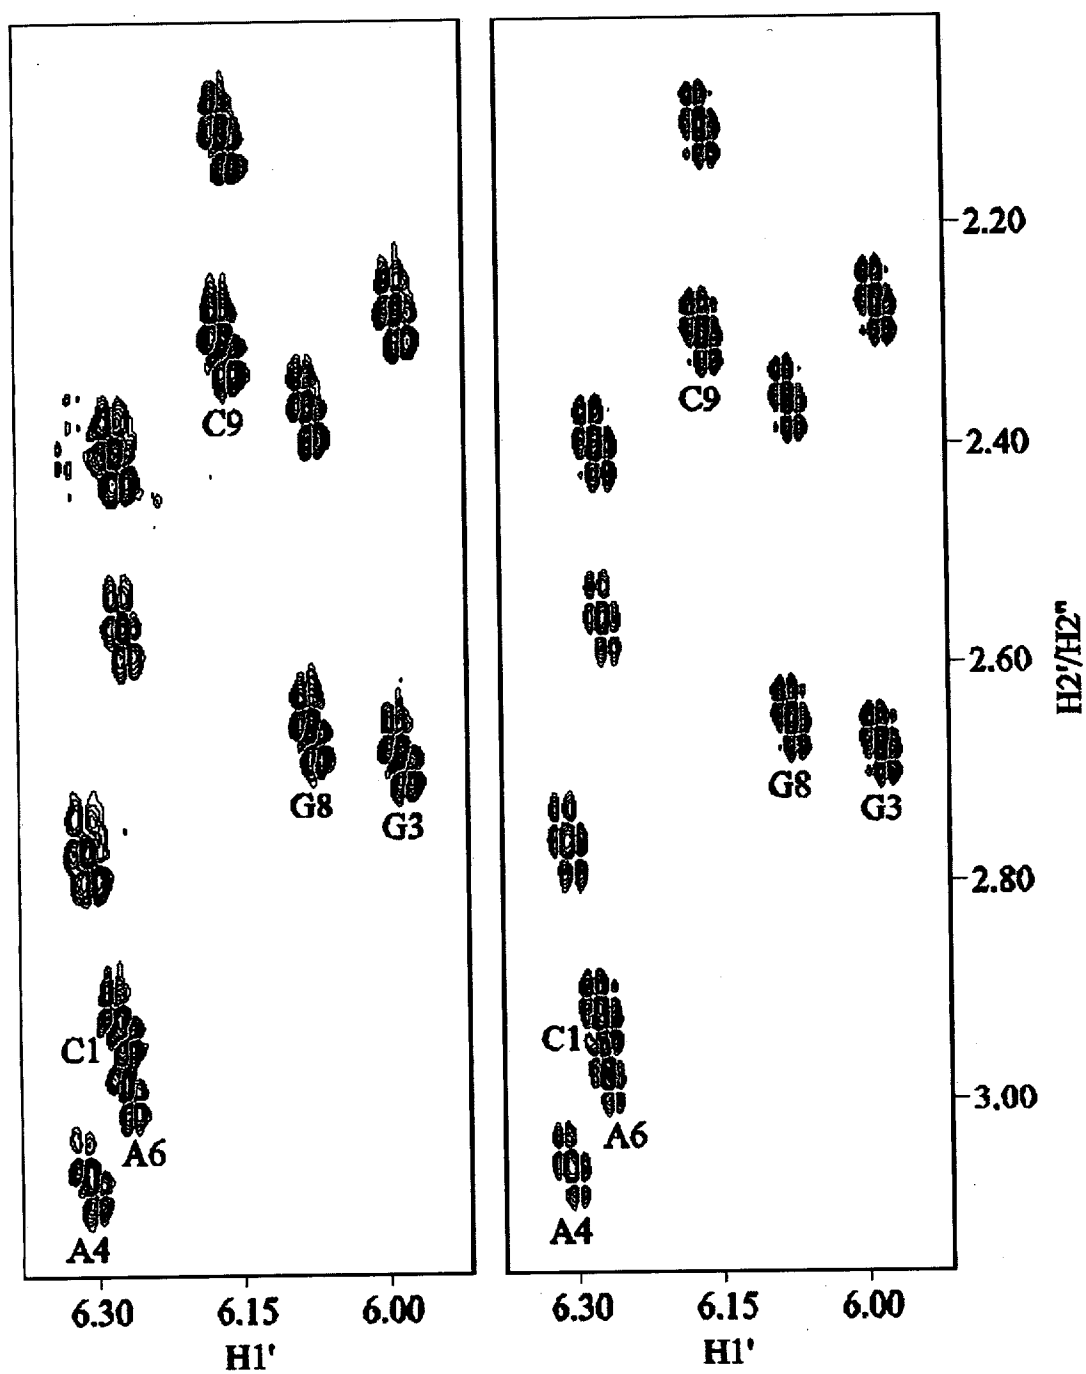

Figure S3

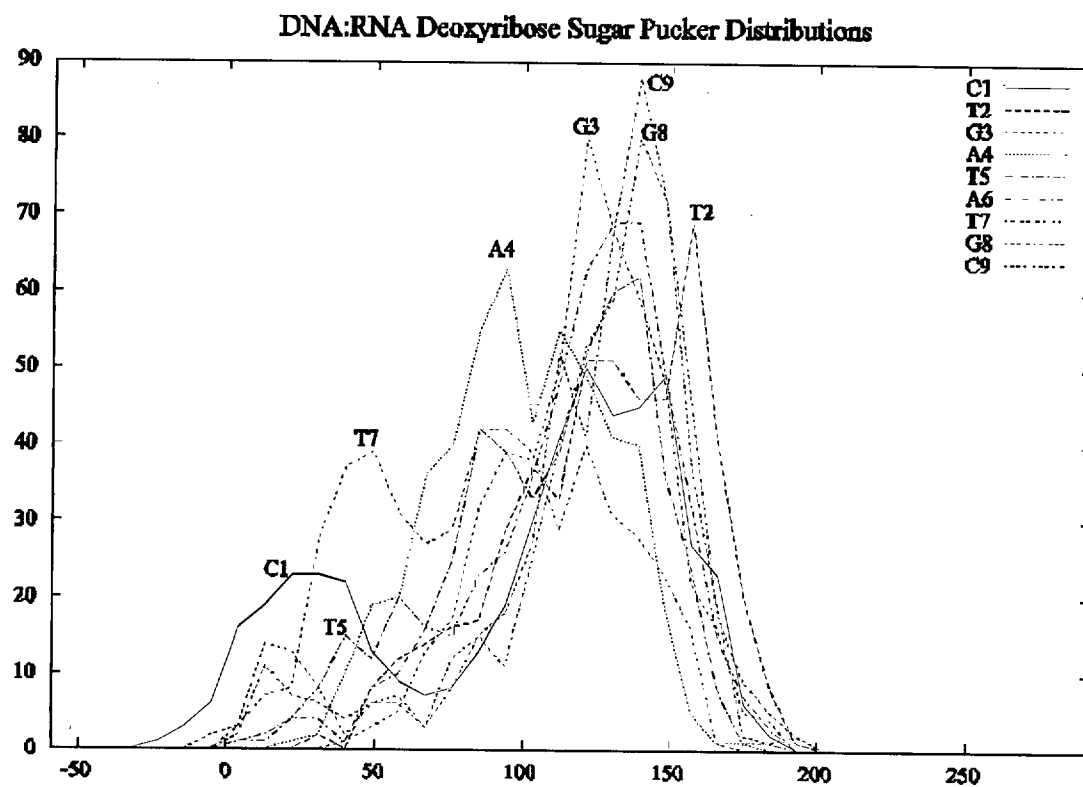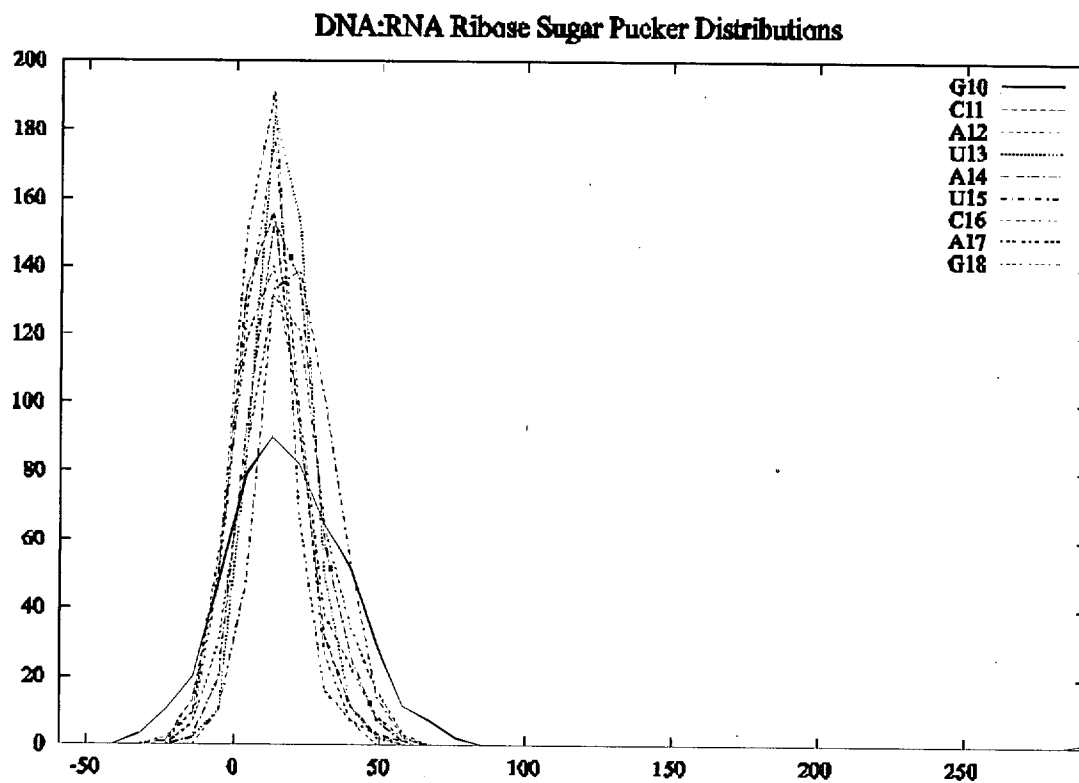

**Figure S4**



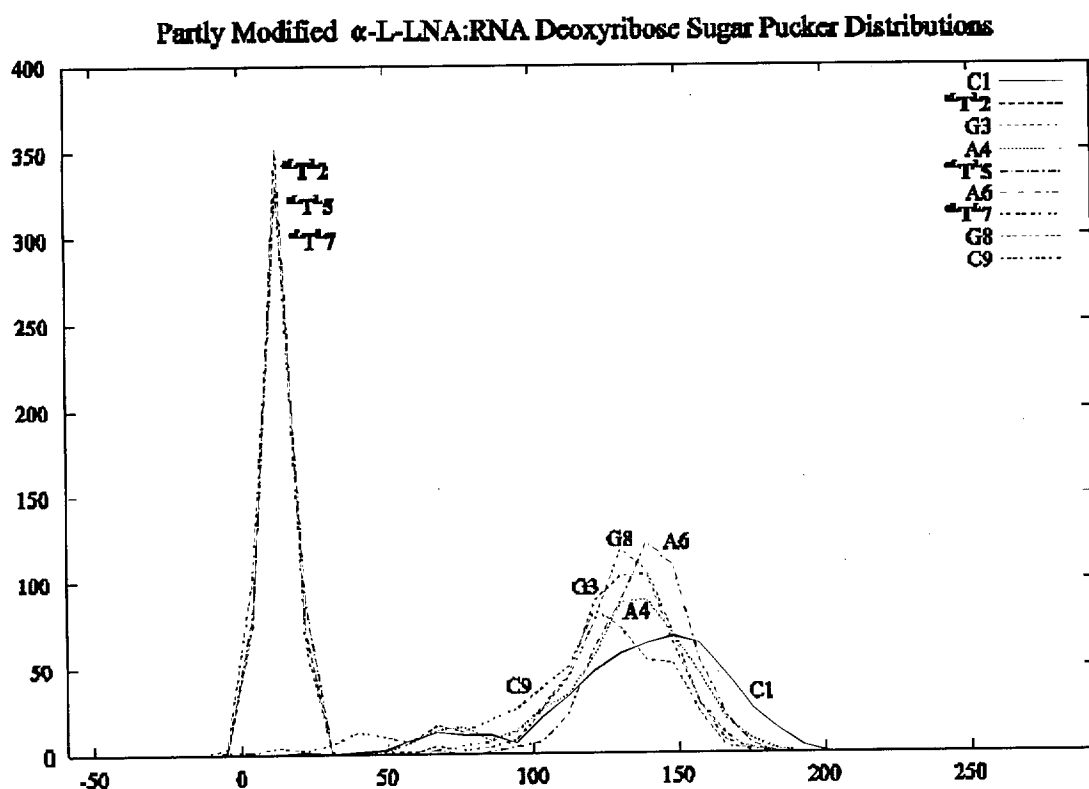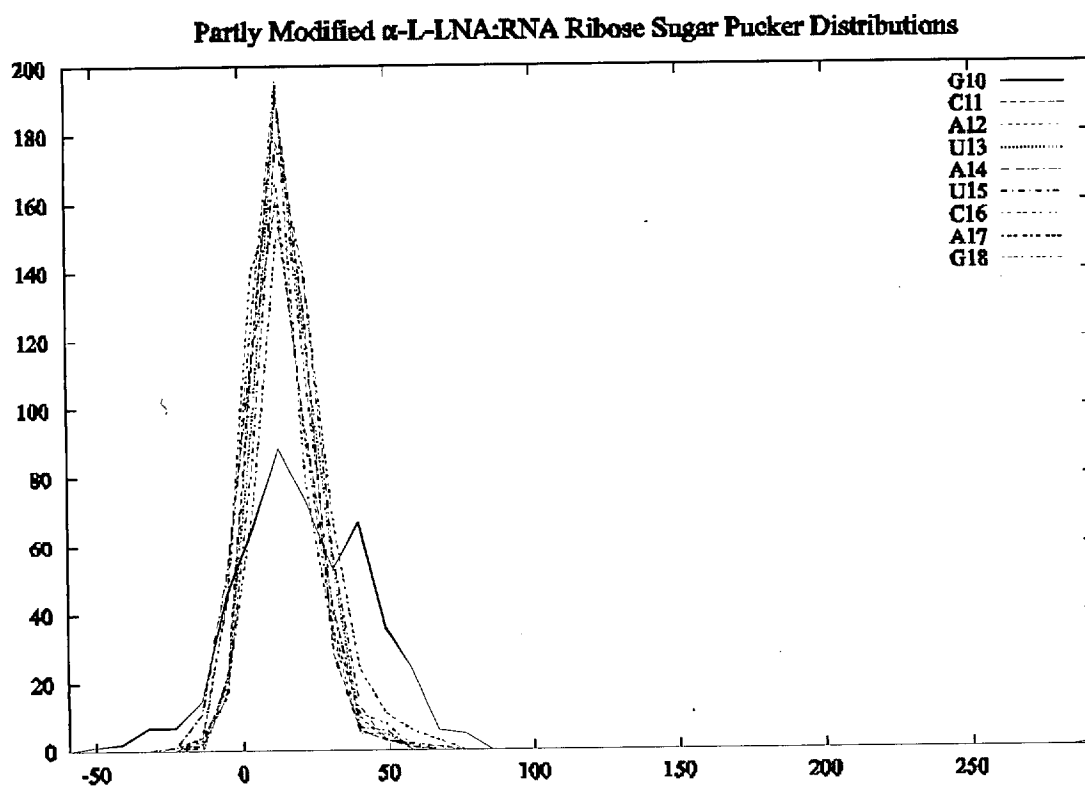

**Figure S5**

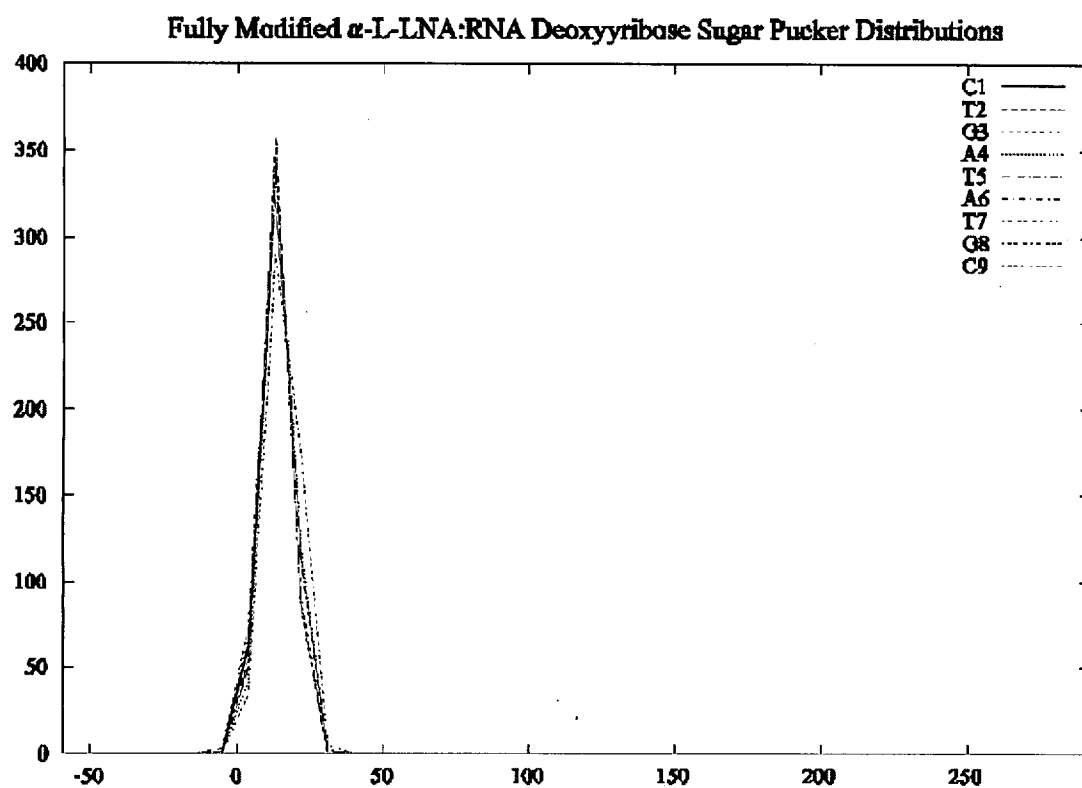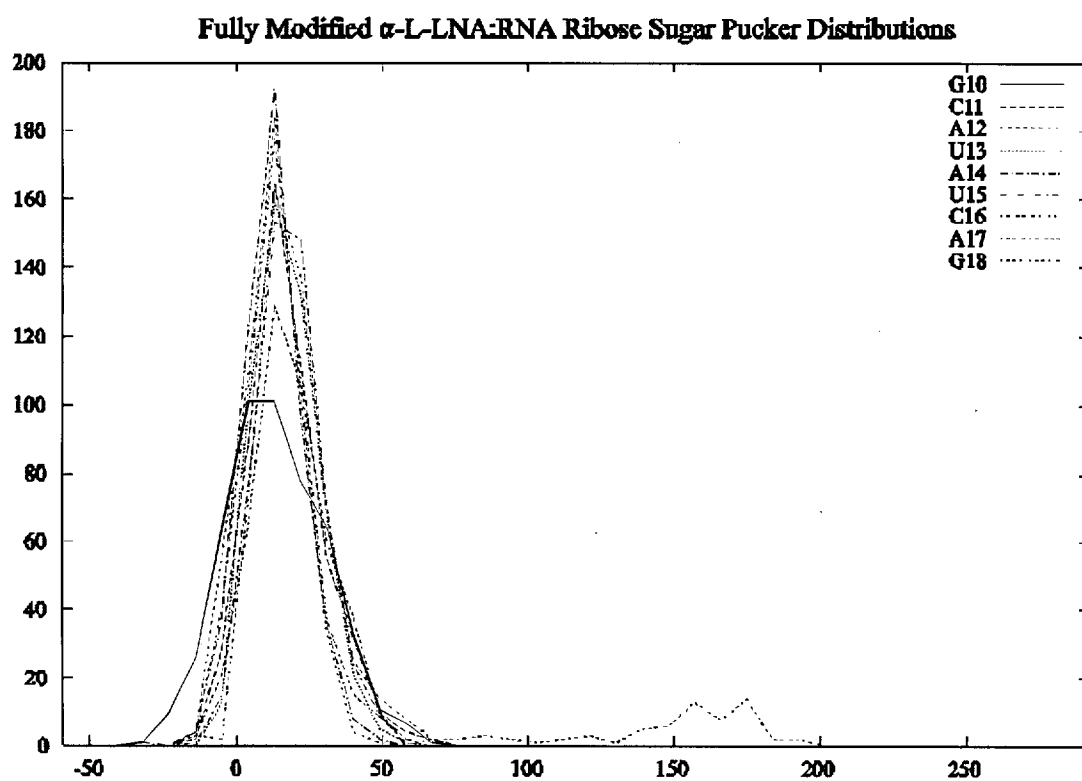

**Figure S6**

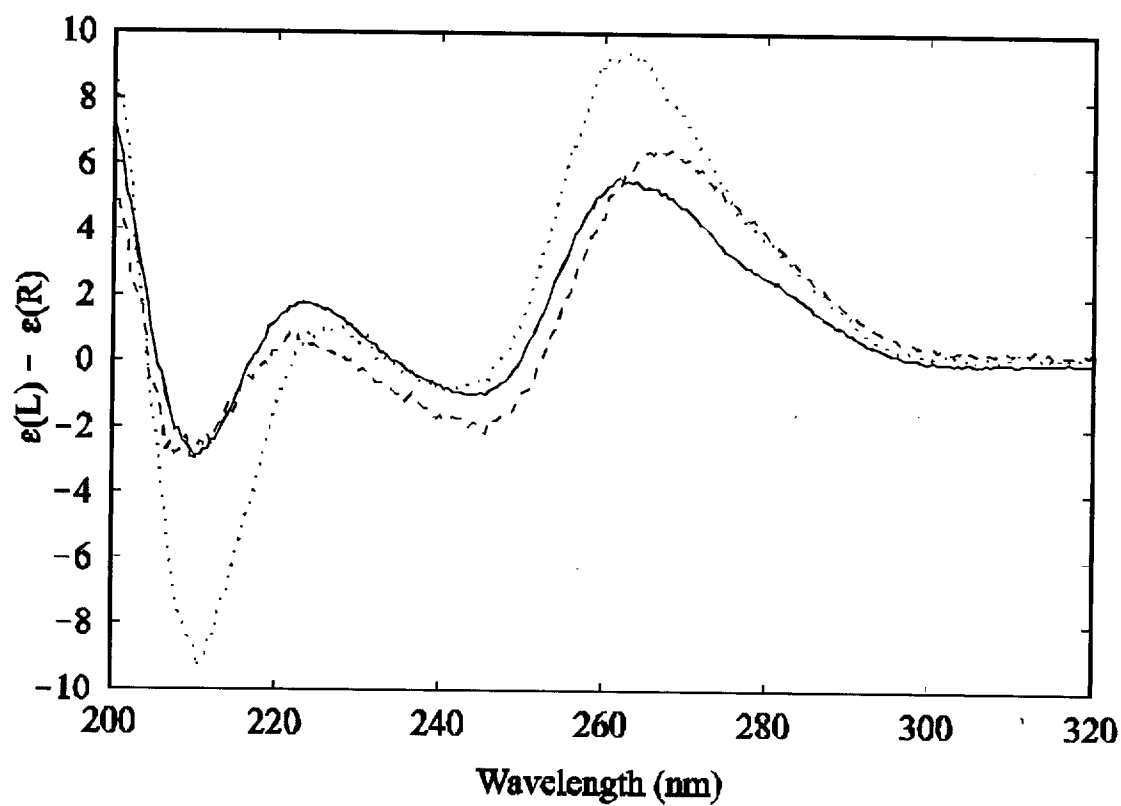

**Figure S7**
